# Supplementary material
Source: Springer Nature journal article supplement (https://www.springermedizin.de/resource/supplementary/12890_2013_518_MOESM2_ESM.pdf/9505666)
Supplement: MOESM2 [file 9505666]

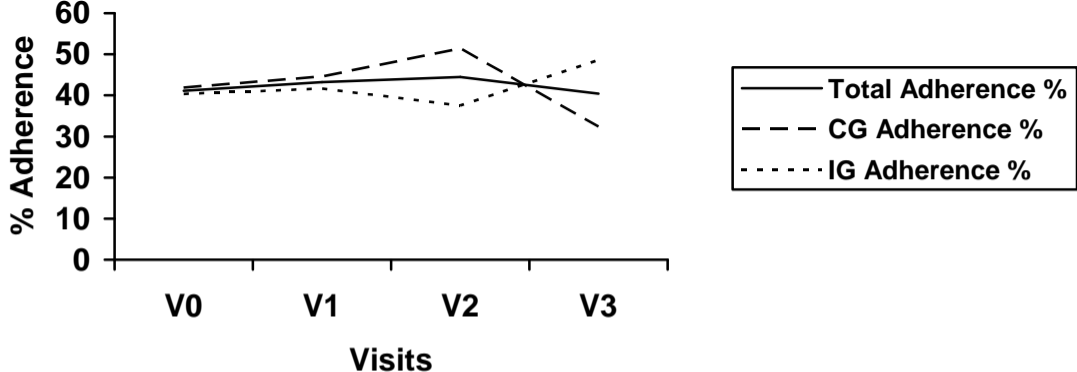

|                                | Visit 0 (V0) | Visit 1 (V1) | Visit 2 (V2) | Visit 3 (V3) |
|--------------------------------|--------------|--------------|--------------|--------------|
| <b>Total Sample</b>            | 41.1         | 43.2         | 44.5         | 40.4         |
| <b>Control Group (CG)</b>      | 41.9         | 44.6         | 51.4         | 32.4         |
| <b>Intervention Group (IG)</b> | 40.3         | 41.7         | 37.5         | 48.6         |
| <b><i>p</i></b>                | 0.843        | 0.721        | 0.092        | <b>0.046</b> |
